# Supplementary material for: The Indo-Pacific Pollen Database – a Neotoma constituent database
Source: Copernicus journal article supplement (doi:10.5194/cp-2024-44), 2024-06-19
Supplement: Supplementary file 1 [file cp-2024-44-supplement.pdf]

| Original depositional environment                       | Depositional environment - broader grouping |
|---------------------------------------------------------|---------------------------------------------|
| Lacustrine Beach                                        | Coastal                                     |
| coastal                                                 | Coastal                                     |
| coastal, estuarine                                      | Coastal                                     |
| lacustrine, playa                                       | Coastal                                     |
| Fluvial                                                 | Fluvial                                     |
| Moraine Dammed Lake                                     | Fluvial                                     |
| fluvial                                                 | Fluvial                                     |
| Glacial                                                 | Glacial                                     |
| Cirque Lake                                             | Lacustrine                                  |
| Drained Lake                                            | Lacustrine                                  |
| Explosion Crater Lake                                   | Lacustrine                                  |
| Glacial Origin Lake                                     | Lacustrine                                  |
| Interdunal Lake                                         | Lacustrine                                  |
| Lacustrine                                              | Lacustrine                                  |
| Lava Flow Dammed Lake                                   | Lacustrine                                  |
| Natural Lake                                            | Lacustrine                                  |
| Natural Lake (Origin Unknown)                           | Lacustrine                                  |
| Small Hollow                                            | Lacustrine                                  |
| Solution Origin Lake                                    | Lacustrine                                  |
| Spring Mound                                            | Lacustrine                                  |
| Wind Origin Lake                                        | Lacustrine                                  |
| lacustrine                                              | Lacustrine                                  |
| lacustrine, drained lake                                | Lacustrine                                  |
| lacustrine, natural open-water                          | Lacustrine                                  |
| lacustrine, natural open-water, glacial origin          | Lacustrine                                  |
| lacustrine, natural open-water, tectonic lake           | Lacustrine                                  |
| lacustrine, volcanic lake                               | Lacustrine                                  |
| marine                                                  | Marine                                      |
| Archaeological                                          | Terrestrial                                 |
| terrestrial                                             | Terrestrial                                 |
| terrestrial, cave sediments                             | Terrestrial                                 |
| terrestrial, soil, buried soil                          | Terrestrial                                 |
| Fen                                                     | Wetlands                                    |
| Mire                                                    | Wetlands                                    |
| Swamp                                                   | Wetlands                                    |
| Valley Mire                                             | Wetlands                                    |
| terrestrial, mire (i.e. peatland, >30cm peat)           | Wetlands                                    |
| terrestrial, mire, bog                                  | Wetlands                                    |
| terrestrial, mire, bog, blanket bog                     | Wetlands                                    |
| terrestrial, mire, fen                                  | Wetlands                                    |
| terrestrial, mire, swamp (forested wetland or peatland) | Wetlands                                    |
| Unknown                                                 | Unknown                                     |
| NA                                                      | Unknown                                     |
