# Supplementary material for: The Indo-Pacific Pollen Database – a Neotoma constituent database
Source: Copernicus journal article supplement (doi:10.5194/cp-2024-44), 2024-06-19

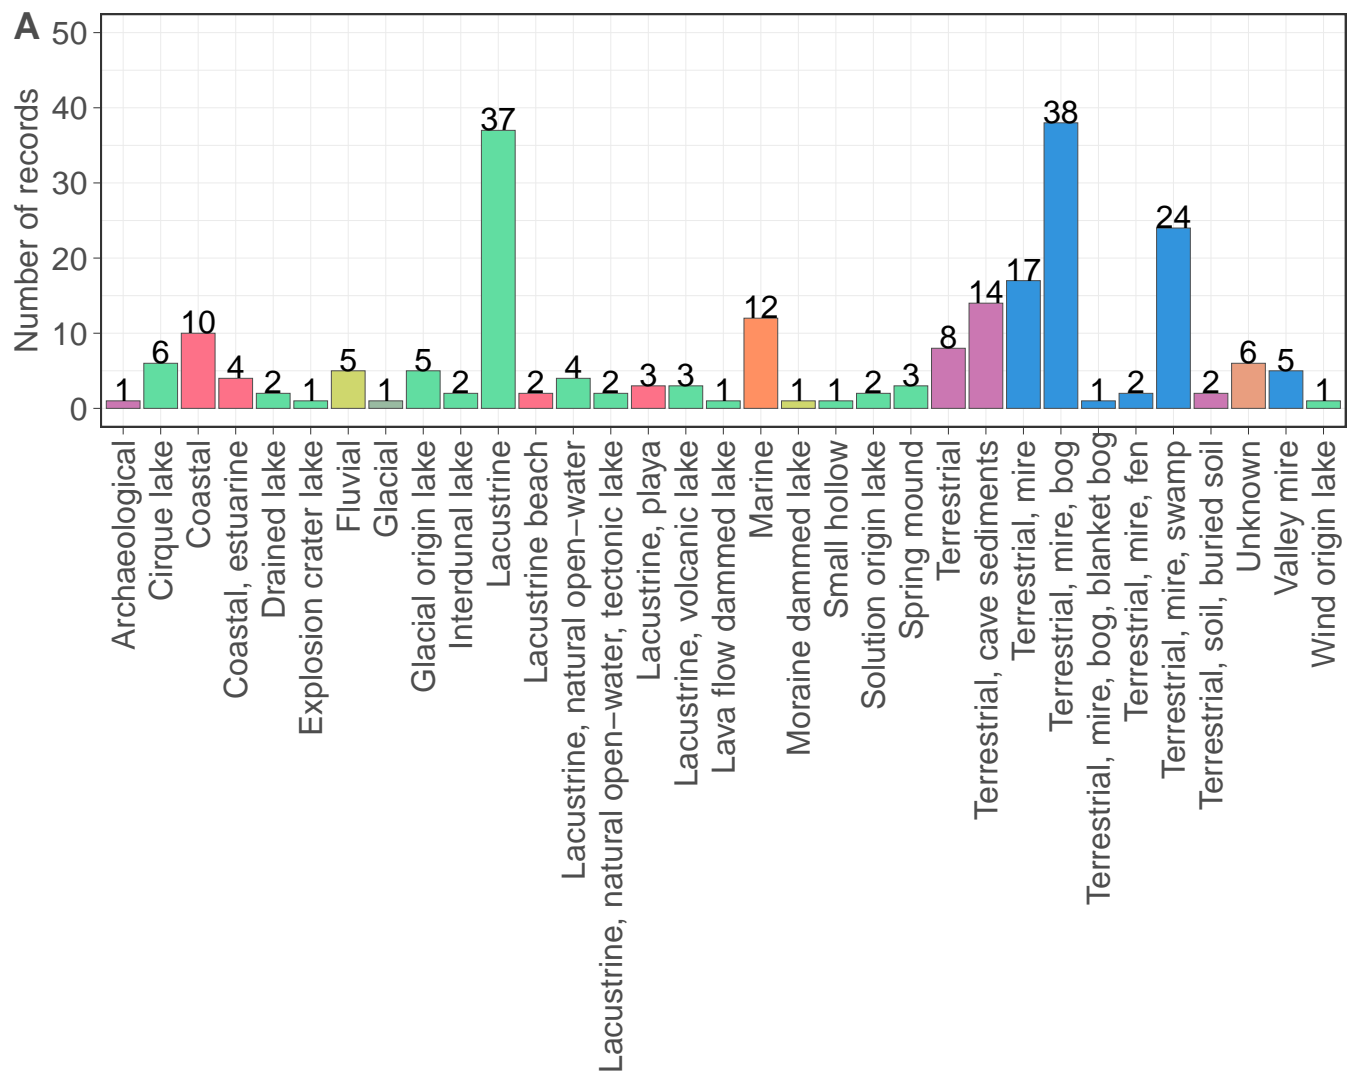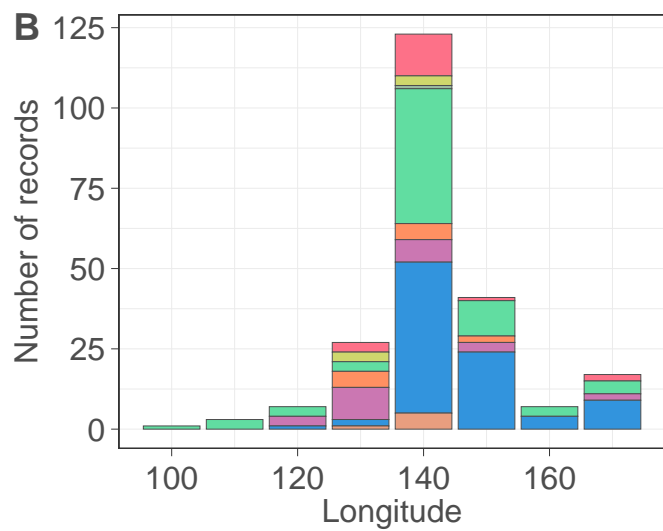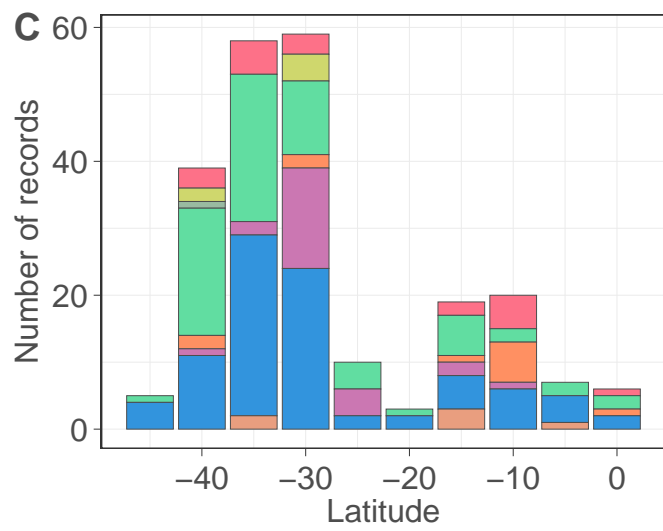

Supplement: Supplementary file [file cp-2024-44-AC2-supplement.pdf]
